# Supplementary material for: Normal versus Pathological Cardiac Fibroblast-Derived Extracellular Matrix Differentially Modulates Cardiosphere-Derived Cell Paracrine Properties and Commitment
Source: Hindawi journal article supplement (doi:10.1155/2017/7396462), 2017-01-01
Supplement: f1 [file 7396462.f1.pdf]

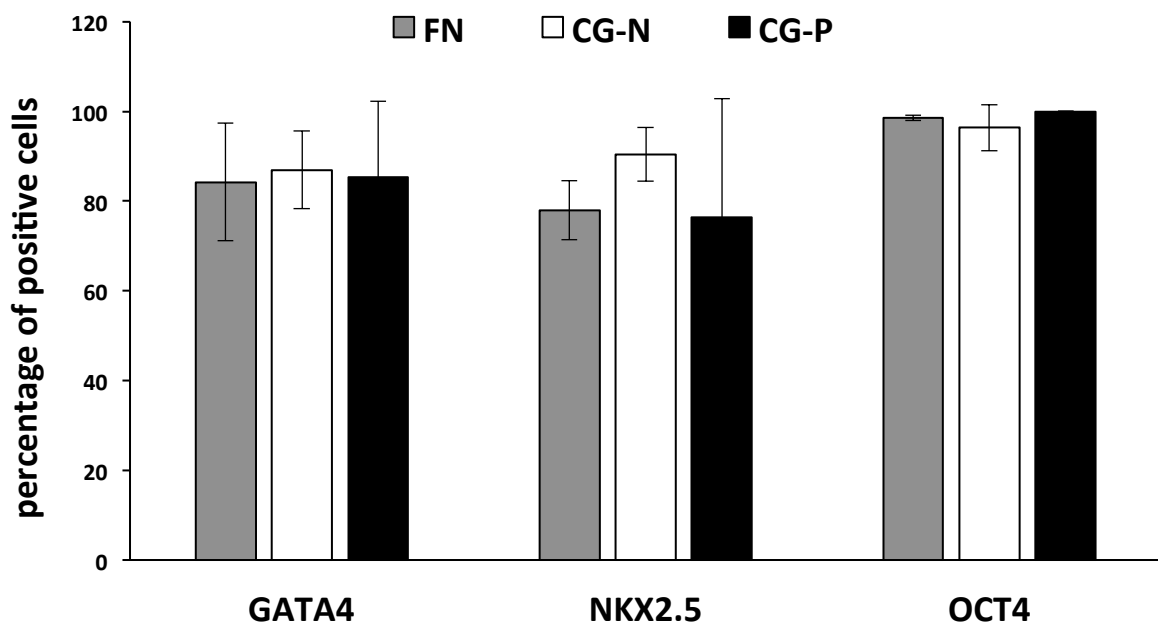

**Supplementary figure 1: Quantification of immunofluorescence staining.** Bargraph shows the percentage of cells positive for GATA4, NKX2-5 and OCT4 as per immunostaining shown in figure 3.
